# Supplementary material for: Self-standing Li1.2Mn0.6Ni0.2O2/graphene membrane as a binder-free cathode for Li-ion batteries
Source: Royal Society of Chemistry journal article supplement (doi:10.1039/c8ra06086j), 2018-01-01
Supplement: c8ra06086j1.pdf [file c8ra06086j1.pdf]

**Electronic Supplementary Information**

**Self-standing  $\text{Li}_{1.2}\text{Mn}_{0.6}\text{Ni}_{0.2}\text{O}_2$ /Graphene Membrane as Binder-free  
cathode for Li-ion batteries**

Yang puheng,<sup>a</sup> Wang wenxu<sup>a</sup>, Zhang xiaoliang<sup>a</sup>, Li honglei<sup>a</sup>, Xing yalan<sup>a</sup> and Zhang shichao\*<sup>a</sup>

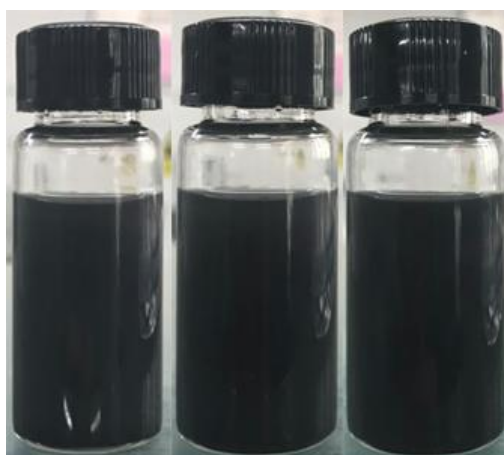

**Fresh 48 h 96 h**

**Figure S1.** The suspension of graphene sheet dispersed ethylene glycol for different durations. The suspension shows nearly no change after 96 hours, exhibiting the excellent dispersion of graphene sheet.

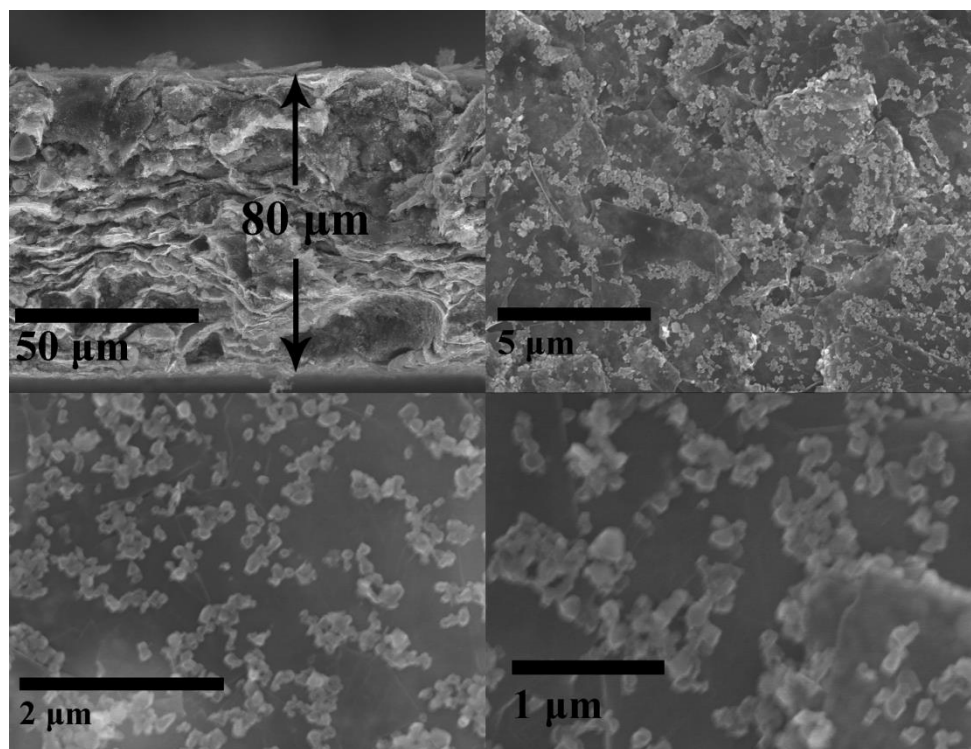

**Figure S2.** SEM images of LMR/G-30.

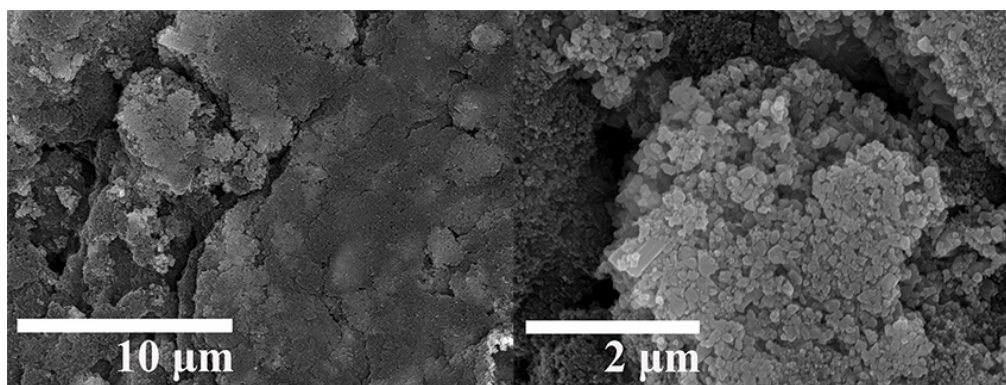

**Figure S3.** SEM images of LMR cathode electrode.

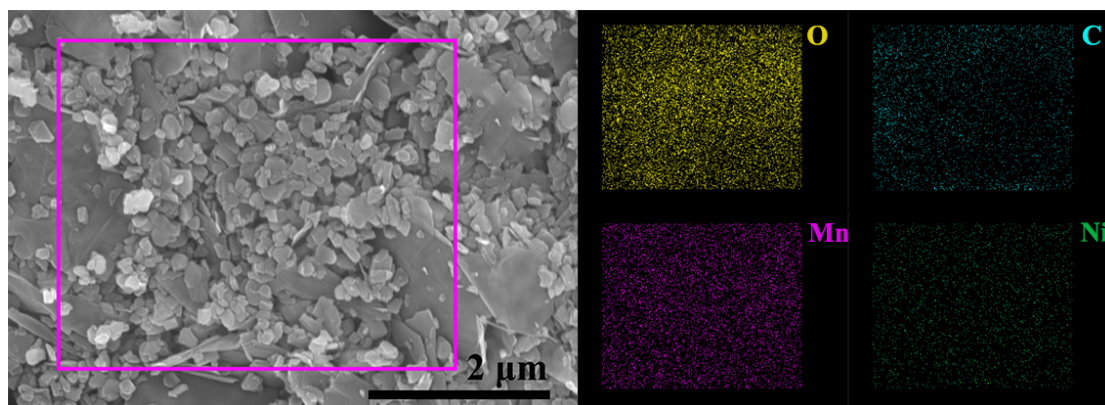

**Figure S4.** SEM image and corresponding EDS elemental mapping of LMR/G.

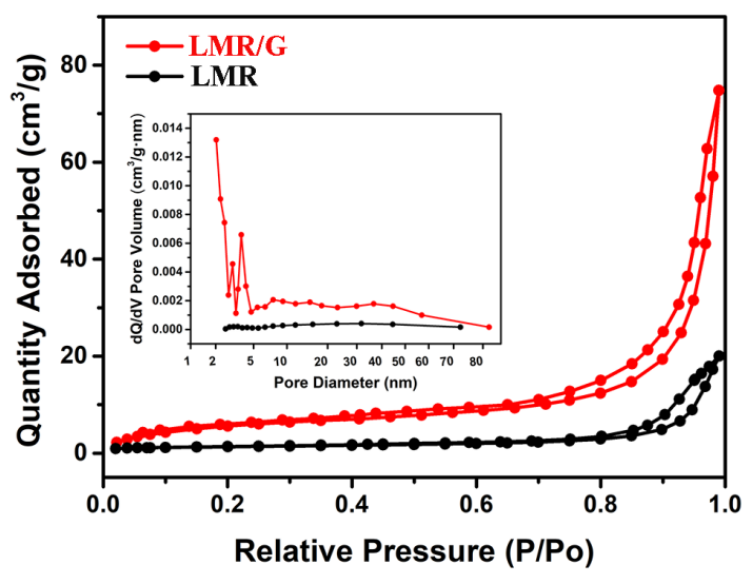

**Figure S5.** Nitrogen adsorption-desorption isotherms and pore size distribution of LMR and LMR/G.

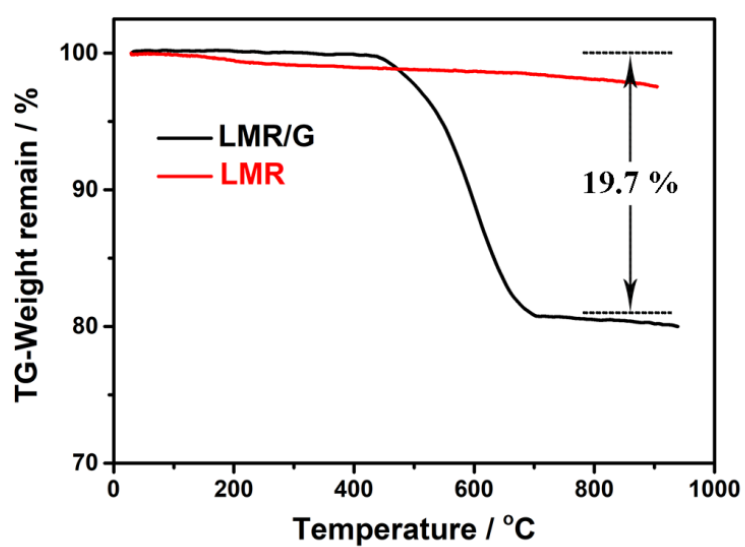

Figure S6. TG curves of LMR and LMR/G.

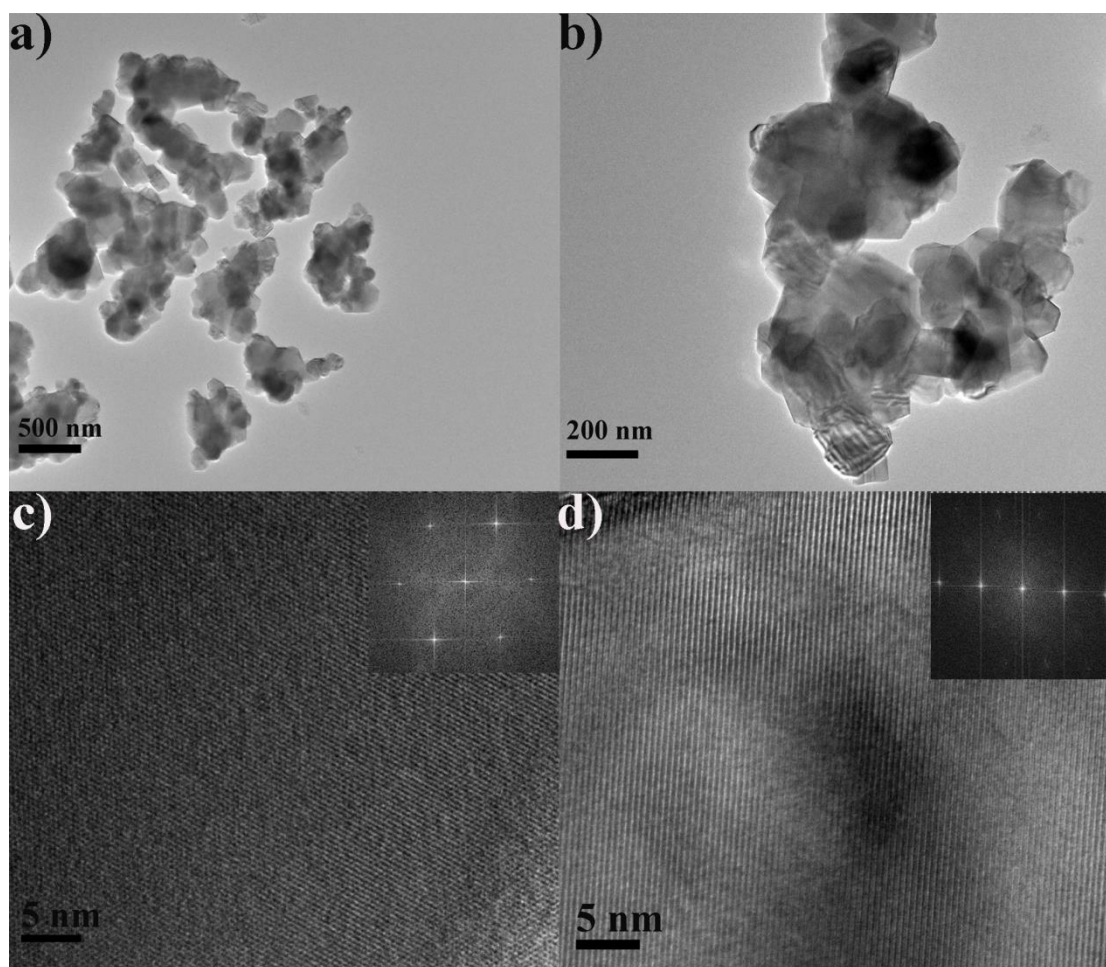

**Figure S7.** (a) Low-magnification TEM image of LMR. (b) High-magnification TEM image of LMR. (c) and (d) HRTEM images and corresponding Fast Fourier Transform images of LMR.



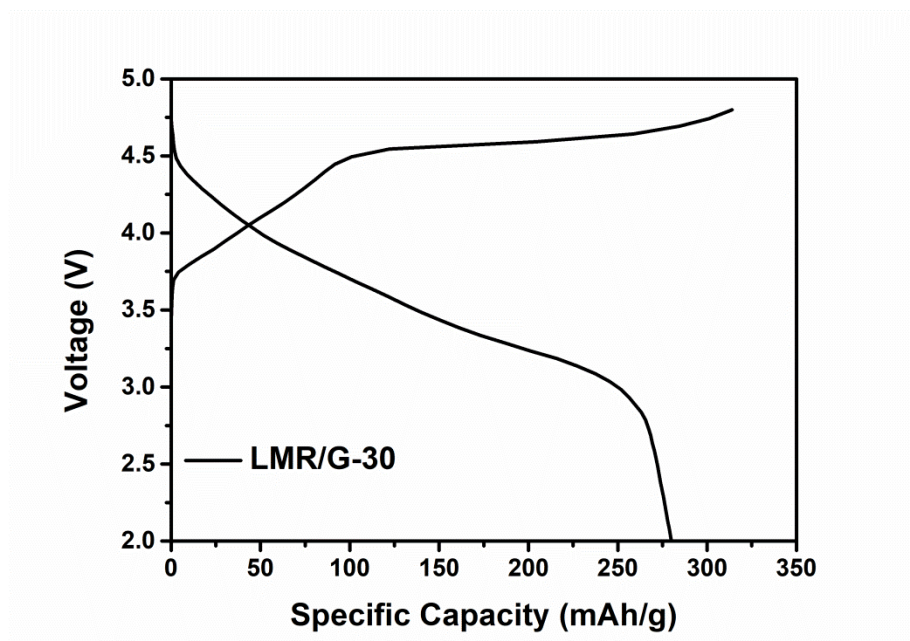

**Figure S8.** Charge and discharge curve of LMR/G-30 during the first cycle at 0.1 C.

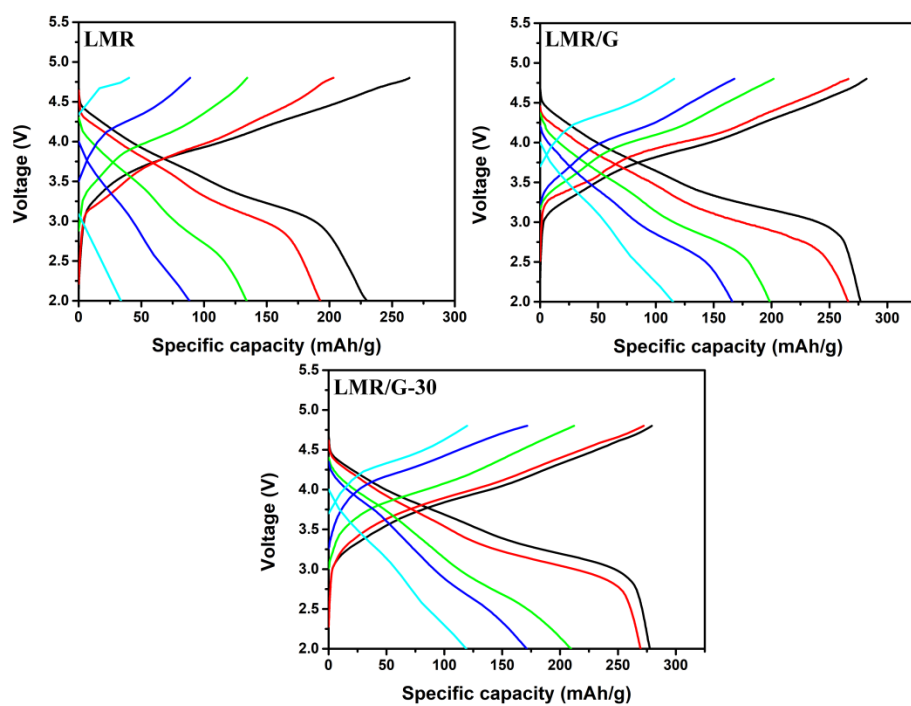

**Figure S9.** Voltage profiles of LMR, LMR/G and LMR-30 at different current densities.

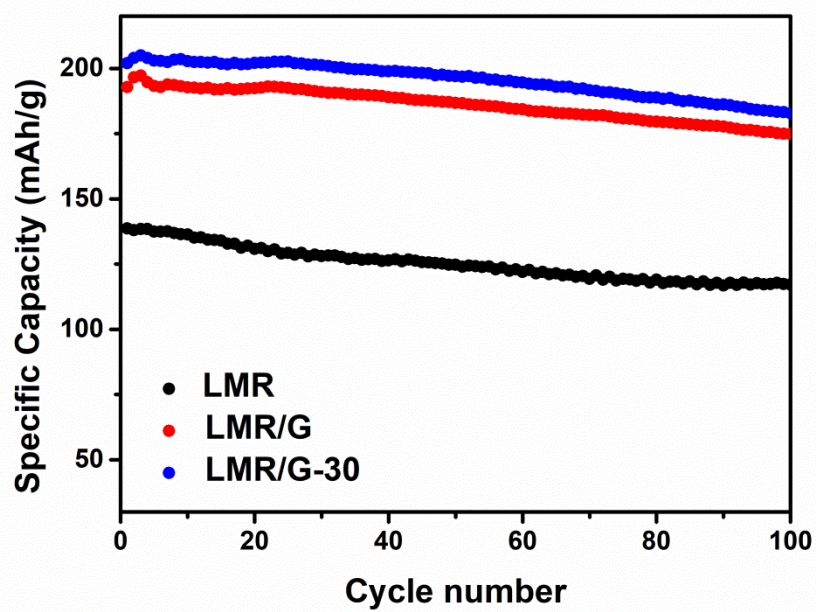

**Figure S10.** Discharge capacities of all samples at 1 C during 100 cycles.

**Table S1.** Summary of the initial coulombic efficiencies (ICE) at the current density of 25 mA/g in comparison to literatures reported LROs samples.

| Preparation method                                                                                                                                           | ICE before modified | ICE before modified | Ref. |
|--------------------------------------------------------------------------------------------------------------------------------------------------------------|---------------------|---------------------|------|
| Ultrasonic method                                                                                                                                            |                     |                     |      |
| Mixing graphene and carbon nanotube with $\text{Li}_{1.2}\text{Mn}_{0.534}\text{Ni}_{0.133}\text{Co}_{0.133}\text{O}_2$                                      | 76.3%               | 82%                 | [1]  |
| Ultrasonic method                                                                                                                                            |                     |                     |      |
| Mixing graphene with $\text{AlF}_3$ coated $\text{Li}_{1.2}\text{Mn}_{0.53}\text{Ni}_{0.13}\text{Co}_{0.13}\text{O}_2$                                       | 70%                 | 69%                 | [2]  |
| In situ method                                                                                                                                               |                     |                     |      |
| Mixing graphene oxide with molten metal salts followed by annealing                                                                                          | 72%                 | 75%                 | [3]  |
| Mechanical method                                                                                                                                            |                     |                     |      |
| Wrapped $\text{Li}[\text{Li}_{0.190}\text{Mn}_{0.540}\text{Co}_{0.143}\text{Ni}_{0.127}]\text{O}_2$ with $\text{AlPO}_4$ @reduced graphene oxide by stirring | 76%                 | 81%                 | [4]  |
| In our work                                                                                                                                                  | 72%                 | 90%                 |      |

**Table S2.** Discharge capacities of LMR, LMR/G and LMR/G-30 at 0.1 C, 0.2 C, 1 C, 2 C and 5 C.

|          | 0.1 C<br>(mAh/g) | 0.2 C<br>(mAh/g) | 1 C<br>(mAh/g) | 2 C<br>(mAh/g) | 5 C<br>(mAh/g) |
|----------|------------------|------------------|----------------|----------------|----------------|
| LMR      | 239              | 195              | 136            | 88             | 34             |
| LMR/G    | 278              | 266              | 198            | 165            | 115            |
| LMR/G-30 | 280              | 271              | 209            | 172            | 121            |

**Table S3.** Fitting results of the EIS data for LMR, LMR/G and LMR/G-30

|          | $R_e$ ( $\Omega$ ) | $R_{SEI}$ ( $\Omega$ ) | $R_{ct}$ ( $\Omega$ ) |
|----------|--------------------|------------------------|-----------------------|
| LMR      | 4                  | 153                    | 197                   |
| LMR/G    | 4                  | 21                     | 51                    |
| LMR/G-30 | 4                  | 26                     | 41                    |

### Notes and references

- [1] HUANG Y L, HOU X H, MA S M, et al. Template GNL-assisted synthesis of porous  $\text{Li}_{1.2}\text{Mn}_{0.534}\text{Ni}_{0.133}\text{Co}_{0.133}\text{O}_2$ : towards high performance cathodes for lithium ion batteries [J]. *Rsc Adv*, 2015, 5(32): 25258-65.
- [2] CHEN D R, TU W Q, CHEN M, et al. Synthesis and performances of Li-Rich@AlF<sub>3</sub>@Graphene as cathode of lithium ion battery [J]. *Electrochim Acta*, 2016, 193(45-53).
- [3] ZHAO Y J, WANG Y, JI C W, et al. Electrochemistry and structure of Li-rich cathode composites:  $\text{Li}_{1.26}\text{Fe}_{0.22}\text{Mn}_{0.52}\text{O}_2$  in situ integrated with conductive network-graphene oxide for lithium-ion batteries [J]. *Rsc Adv*, 2016, 6(38): 31762-8.
- [4] KIM I, KNIGHT J, CELIO H, et al. Enhanced electrochemical performances of Li-rich layered oxides by surface modification with reduced graphene oxide/AlPO<sub>4</sub> hybrid coating [J]. *J Mater Chem A*, 2014, 2(23): 8696-704.
